# Supplementary material for: Alternative NHEJ Pathway Components Are Therapeutic Targets in High-Risk Neuroblastoma
Source: Oxford University Press journal article supplement (doi:10.1158/1541-7786.mcr-14-0337), 2015-01-07
Supplement: 15417786mcr140337-sup-133212_2_supp_2745285_nf1pfy.doc [file 15417786mcr140337-sup-133212_2_supp_2745285_nf1pfy.doc]

**Supplemental Figure Legend**

**Supplemental 1**

Reporter substrates were utilized for HR and NHEJ quantification analysis. The reporter constructs allow quantification of DSB repair in terms of repair efficiency and fidelity. The repair constructs consists of a *GFP* gene with an engineered intron with an adenoviral or *PEM1* exon flanked by restriction sites for induction of DSBs by either HindIII (compatible cohesive ends) or I-SceI (incompatible ends) enzymes. The *GFP* gene is active and detected by FACS analysis only upon reconstitution and successful NHEJ or HR.

**Supplemental 2**

Plasmid end-joining errors were detected utilizing pGFP-PEM1 with BsrG1. In contrast to Hind III, BsrG1 is an endonuclease that introduces a DSB with compatible ends inside the exon of GFP and only accurate repair of BsrG1 digested pGFP-PEM1 can generate GFP positive cells whereas Hind III tolerates microdeletions.

**Supplemental 3**

NB cell lines have differential NHEJ repair protein expression patterns. Representative Western blot analysis of NHEJ repair protein expression in stromal-like cells (SH-EP1) and neuroblastic cells with segmental chromosomal alterations (SH-SY5Y, SK-N-Be(2), IMR32, LA1-55n). Lysates were immunoblotted with Ku70, Ku80, Lig4, Artemis, Lig3, Lig1, PARP1, RAD51, and RAD54 antibodies. GAPDH was used as loading control.

**Supplemental 4**

Representative immunoblot demonstrating PARP1 cleavage in IMR32 cells in response to Lig3 siRNA knockdown. We utilized PARP1 cleavage as an indicator of apoptosis and found that Lig3 siRNA triggered an apoptotic cell death response. Adequate Lig3 siRNA silencing was confirmed at 72h by immunoblotting with Lig III antibody. GAPDH was used as loading control.
